# Supplementary material for: Sutureless versus Hand-Sewn Coronary Anastomoses: A Systematic Review and Meta-Analysis
Source: MDPI journal article supplement (doi:10.3390/jcm11030749), 2022-01-29
Supplement: s1 [file s1]

## SUPPLEMENTARY DATA

### Search strategy

#### A. Pubmed incl. MEDLINE

(coronary artery bypass graft\*[Title/Abstract] OR CABG[Title/Abstract] OR coronary surgery[Title/Abstract] OR cardiovascular surger\*[Title/Abstract] OR coronary vessel\*[Title/Abstract] OR lad[Title/Abstract] OR Left anterior descending arter\*[Title/Abstract] OR lima[Title/Abstract] OR "left internal mammarian"[Title/Abstract] OR "left internal mammary"[Title/Abstract] OR "left internal thoracic"[Title/Abstract] OR LITA[Title/Abstract] OR coronary arter\*[Title/Abstract] OR "Coronary Artery Bypass"[Mesh] OR "Coronary Vessels"[Mesh])

AND

(device\*[Title/Abstract] OR connector\*[Title/Abstract] OR stapler\*[Title/Abstract] OR instrument\*[Title/Abstract] OR anastomotic technique\*[Title/Abstract] OR experimental\*[Title/Abstract] OR sutureless[Title/Abstract] OR facilitated[Title/Abstract] OR clip\*[Title/Abstract] OR bonding[Title/Abstract] OR probe\*[Title/Abstract] OR non-suture[Title/Abstract] OR nonsuture[Title/Abstract] OR stapl\*[Title/Abstract] OR "Surgical Stapling"[Mesh] OR surgical staplers[MeSH])

AND

(hand-sutured[Title/Abstract] OR sutur\*[Title/Abstract] OR conventional[Title/Abstract] OR anastom\*[Title/Abstract] OR graft\*[Title/Abstract] OR "Suture Techniques"[Mesh])

#### B. EMBASE

('coronary artery bypass graft\*':ti,ab,kw OR 'CABG':ti,ab,kw OR 'coronary surgery':ti,ab,kw OR 'cardiovascular surger\*':ti,ab,kw OR 'coronary vessel':ti,ab,kw OR 'lad':ti,ab,kw OR 'left anterior descending arter\*':ti,ab,kw OR 'lima':ti,ab,kw OR 'left internal mammarian':ti,ab,kw OR 'left internal mammary':ti,ab,kw OR 'left internal thoracic':ti,ab,kw OR 'lita':ti,ab,kw OR 'coronary arter\*':ti,ab,kw OR 'coronary vessels surgery'/exp OR 'coronary artery surgery'/exp)

AND

('device\*':ti,ab,kw OR 'connector\*':ti,ab,kw OR 'stapler\*':ti,ab,kw OR 'instrument\*':ti,ab,kw OR 'anasomotic technique\*':ti,ab,kw OR 'experimental\*':ti,ab,kw OR 'sutureless':ti,ab,kw OR 'facilitated':ti,ab,kw OR 'clip\*':ti,ab,kw OR 'probe\*':ti,ab,kw OR 'non-suture':ti,ab,kw OR 'nonsuture':ti,ab,kw OR 'stapl\*':ti,ab,kw OR 'surgical stapling'/exp OR 'connector'/exp OR 'anastomotic device'/exp)

AND

('hand-sutured':ti,ab,kw OR 'sudur\*':ti,ab,kw OR 'conventional':ti,ab,kw OR 'anastom\*':ti,ab,kw OR 'graft\*':ti,ab,kw OR 'suture technique'/exp OR 'vascular suture'/exp)

**Table S1.** PICOS-table on in- and exclusion criteria.

| Parameter    | Inclusion criteria                                         | Exclusion criteria                                                                                    |
|--------------|------------------------------------------------------------|-------------------------------------------------------------------------------------------------------|
| Patients     | Humane, adult (18 years or older) population               | Animal or cadaveric trials, or >50% of the included population underwent emergent or reoperation CABG |
| Intervention | CABG with a sutureless device for the coronary anastomosis |                                                                                                       |
| Control      | CABG with a conventional hand-sewn coronary anastomosis    |                                                                                                       |
| Outcomes     |                                                            |                                                                                                       |
| Study design | Controlled clinical trial<br>MREC approved the trial       |                                                                                                       |

Abbreviations: CABG, coronary artery bypass grafting ; MREC, medical research ethics committee.

**Table S2.** Newcastle-Ottawa quality assessment for cohort studies.

| Study             | Selection                                |                                |                           |                                                           | Comparability                                                                           |                        | Outcome                                |                       | Total (8/8) |
|-------------------|------------------------------------------|--------------------------------|---------------------------|-----------------------------------------------------------|-----------------------------------------------------------------------------------------|------------------------|----------------------------------------|-----------------------|-------------|
|                   | Representative of the intervention group | Selection of the control group | Ascertainment of exposure | Outcome of interest not present at the start of the study | Comparability of cohorts on the basis of design, or analysis controlled for confounders | Assessment of outcomes | Sufficient follow-up time <sup>a</sup> | Adequacy of follow-up |             |
| Eckstein 2002     | *                                        | *                              | *                         | *                                                         | *                                                                                       | *                      | *                                      | *                     | 8/8         |
| Wiklund 2005      | *                                        | *                              | *                         | *                                                         | *                                                                                       | *                      | *                                      | *                     | 8/8         |
| Klima 2003        | *                                        | *                              | *                         | *                                                         | *                                                                                       | *                      | 0                                      | *                     | 7/8         |
| Vicol 2006        | *                                        | *                              | *                         | *                                                         | *                                                                                       | *                      | *                                      | 0                     | 7/8         |
| Kim 2004          | *                                        | *                              | *                         | *                                                         | *                                                                                       | *                      | 0                                      | *                     | 7/8         |
| Klima 2005        | *                                        | *                              | *                         | *                                                         | *                                                                                       | *                      | *                                      | 0                     | 7/8         |
| Boening 2005      | *                                        | *                              | *                         | *                                                         | *                                                                                       | *                      | *                                      | *                     | 8/8         |
| Cai 2007          | *                                        | 0                              | *                         | *                                                         | 0                                                                                       | *                      | *                                      | 0                     | 5/8         |
| Verberk-moes 2012 | *                                        | *                              | *                         | *                                                         | *                                                                                       | *                      | *                                      | *                     | 8/8         |
| Balkhy 2018       | *                                        | 0                              | *                         | *                                                         | *                                                                                       | *                      | *                                      | *                     | 7/8         |
| Cheng 2021        | *                                        | *                              | *                         | *                                                         | *                                                                                       | *                      | *                                      | *                     | 8/8         |

a. Cut-off on a minimum 30-day follow-up.

**Table S3.** Study design.

| Study         | Device      | Study type | Outcome retrieval | Randomization  | Inclusion                                                                                                                                                                                                                                                                                                                                                                                                                                                                                                                                                                        | Exclusion                                                                                                                                                                                                                                                                                                                                                                                                                                                                                                                                                                                                                                                                                                                                                                                                    |
|---------------|-------------|------------|-------------------|----------------|----------------------------------------------------------------------------------------------------------------------------------------------------------------------------------------------------------------------------------------------------------------------------------------------------------------------------------------------------------------------------------------------------------------------------------------------------------------------------------------------------------------------------------------------------------------------------------|--------------------------------------------------------------------------------------------------------------------------------------------------------------------------------------------------------------------------------------------------------------------------------------------------------------------------------------------------------------------------------------------------------------------------------------------------------------------------------------------------------------------------------------------------------------------------------------------------------------------------------------------------------------------------------------------------------------------------------------------------------------------------------------------------------------|
| Eckstein 2002 | St Jude DAD | NRCT       | Not blinded       | Not randomized | First-time CABG with at least 1 anastomosis vein-coronary, coronary OD < 3mm and ID < 2.5mm, vein graft ID < 3.5mm.                                                                                                                                                                                                                                                                                                                                                                                                                                                              | -                                                                                                                                                                                                                                                                                                                                                                                                                                                                                                                                                                                                                                                                                                                                                                                                            |
| Wiklund 2005  | St Jude DAD | RCT        | Not blinded       | Randomized     | Coronary OD > 2.5mm, coronary ID > 2.0mm, vein graft ID > 3.5mm.                                                                                                                                                                                                                                                                                                                                                                                                                                                                                                                 | Emergency procedures, reoperation CABG, recent neurologic events, significant comorbidities, LVEF < 25%, pregnancy or nursing, requirement of chronic anticoagulation other than acetylsalicylic acid .                                                                                                                                                                                                                                                                                                                                                                                                                                                                                                                                                                                                      |
| Klima 2003    | MVP         | NRCT       | Not blinded       | Not randomized | Multivessel CAD, target coronary artery stenosis ≥ 80%, free of plaque or calcification at the target site, coronary ID > 2mm.                                                                                                                                                                                                                                                                                                                                                                                                                                                   | LVEF < 30%, contraindication to aspirin or clopidogrel, emergent CABG, redo CABG requiring additional noncoronary procedures.                                                                                                                                                                                                                                                                                                                                                                                                                                                                                                                                                                                                                                                                                |
| Vicol 2006    | MVP         | NRCT       | Not blinded       | Not randomized | Target coronary artery with high-grade stenosis, coronary ID > 1.5mm, no atherosclerotic plaque at the target site.                                                                                                                                                                                                                                                                                                                                                                                                                                                              | Contraindication for antiplatelet therapy, in whom MRI is planned, patients who refuse implantation.                                                                                                                                                                                                                                                                                                                                                                                                                                                                                                                                                                                                                                                                                                         |
| Kim 2004      | AADD        | NRCT       | Not blinded       | Not randomized | -                                                                                                                                                                                                                                                                                                                                                                                                                                                                                                                                                                                | Failure of graft flaring onto the implant pins, small and diseased coronary target, conversion to CPB.                                                                                                                                                                                                                                                                                                                                                                                                                                                                                                                                                                                                                                                                                                       |
| Klima 2005    | CAC         | NRCT       | Not blinded       | Not randomized | -                                                                                                                                                                                                                                                                                                                                                                                                                                                                                                                                                                                | Severely sclerotic and calcified coronaries, tandem stenoses, too small or fragile-appearing vessels, vessels with inadequate flow distribution area, intramuscular segments, multiple-stented targets.                                                                                                                                                                                                                                                                                                                                                                                                                                                                                                                                                                                                      |
| Boening 2005  | CAC         | NRCT       | Not blinded       | Not randomized | Between 35 and 80 years of age, informed consent, agrees to follow-up evaluation, no known contraindications for CAG, candidate for isolated CABG via median sternotomy and scheduled for at least one non-lad saphenous vein bypass graft, target coronary artery stenosis > 50% per CAG, vein graft ID 3.0 - 4.0mm and free of distal ligating clips or suture ligatures and sufficient length to cut off the connector in case of conversion, coronary ID > 2mm, proximal aortic anastomosis on connector-graft is hand-sewn and provides solely flow to the connector graft. | No informed consent, participating in other clinical investigation to device or drug, history of cerebrovascular disease, renal insufficiency (creat < 3.0mg/dl or dialysis daily), LVEF < 25%, history of malignant ventricular tachyarrhythmia, sustained VT or VF leading to cardiac arrest, contraindication to antiplatelet therapy that includes aspirin and clopidogrel, patient has had previous cardiac surgery, pregnant or nursing, HIV positive or hepatic failure, hemodynamic instability that requires inotropic support or a mechanical assist device, allergy to nickel, coronary target is severely calcified or contains soft atheroma anteriorly within 2mm proximally from the heel and 4mm distally from the toe, connector-graft is a Y-graft, connector graft is a sequential graft. |

**Table S3.** Study design, continued.

| Study             | Device | Study type                | Outcome retrieval             | Randomization  | Inclusion                                                                                                                                                                                                                                                                                                       | Exclusion                                                                                                                                                                                                                                                                                                                                                                                                                                                                                                                                                                                                                                                                                                                       |
|-------------------|--------|---------------------------|-------------------------------|----------------|-----------------------------------------------------------------------------------------------------------------------------------------------------------------------------------------------------------------------------------------------------------------------------------------------------------------|---------------------------------------------------------------------------------------------------------------------------------------------------------------------------------------------------------------------------------------------------------------------------------------------------------------------------------------------------------------------------------------------------------------------------------------------------------------------------------------------------------------------------------------------------------------------------------------------------------------------------------------------------------------------------------------------------------------------------------|
| Cai 2007          | C-port | NRCT (historical control) | Not blinded                   | Not randomized | -                                                                                                                                                                                                                                                                                                               | Poor vein grafts, severely diseased and small coronary targets < 1mm, any emergent procedures, need for IABP, any bleeding diathesis.                                                                                                                                                                                                                                                                                                                                                                                                                                                                                                                                                                                           |
| Verberk-moes 2012 | C-port | RCT                       | Single blinded (participants) | Randomized     | Informed consent, > 17 years of age, willing and able to have follow-up visits and examinations, EuroSCORE < 2, at least 2VD, target vessel free from severe calcifications, coronary target ID > 1.25mm and single wall thickness < 0.75mm, donor graft of suitable quality and single wall thickness < 0.75mm | Emergency procedures, unable to meet study requirements, participation in other clinical trial, pregnancy, not a standard CABG or concomitant valve surgery, history of any cardiac surgery other than PTCA and stent placement, history of IABP within the last 30 days, congestive heart failure or NYHA IV in the last 30 days, history of bleeding disorder or thromboembolic disease requiring anticoagulation therapy, hemodynamical instability, history or acute or chronic dialysis, creat > 200 mmol/ml in the last 30 days, documented or suspected acute systemic infection, need for immunosuppressive therapy, CVA within the last 2 weeks, allergy or other contraindication for aspirin or other anticoagulants |
| Balkhy 2018       | C-port | NRCT (historical control) | Not blinded                   | Not randomized | Patients receiving at least 1 C-port in routine CABG, informed consent, able to make follow-up appointments and examinations, age < 80, LVEF > 30%, life expectancy > 1year.                                                                                                                                    | Participation in other conflicting clinical trials, unable to meet study requirements, pregnancy, preoperative IABP, bleeding disorder or thromboembolic disease requiring anticoagulants, NYHA IV, contraindication to Aspirin, previous CABG.                                                                                                                                                                                                                                                                                                                                                                                                                                                                                 |
| Cheng 2021        | U-clip | NRCT                      | Not blinded                   | Not randomized | Single LAD-disease, single RCA-disease, multiple vessel CAD with involvement of LAD and possibility to PCI the non-LAD lesions.                                                                                                                                                                                 | History of left lung trauma or surgery, LVEF < 30%, requirement of emergency CABG, presence of severe COPD with inability of single-lung ventilation.                                                                                                                                                                                                                                                                                                                                                                                                                                                                                                                                                                           |

Abbreviations: St. Jude DAD, St. Jude distal anastomotic device ; NRCT, non-randomized controlled trial ; CABG, coronary artery bypass grafting ; OD, outer diameter ; ID, inner diameter ; RCT, randomized controlled trial ; LVEF, left ventricular ejection fraction ; MVP, magnetic vascular positioner ; CAD, coronary artery disease ; MRI, magnetic resonance imaging ; AADD, automated anastomotic distal device ; CPB, cardiopulmonary bypass ; CAC, coronary anastomotic coupler ; CAG, coronary angiography ; VT, ventricular tachycardia ; VF, ventricular fibrillation ; HIV, human immunodeficiency virus ; IABP, intra-aortic balloon pump ; PTCA, percutaneous transluminal coronary angioplasty ; CVA, cerebrovascular event ; LAD, left anterior descending coronary artery ; RCA, right coronary artery ; PCI, percutaneous coronary intervention ; COPD, chronic obstructive pulmonary disease. -, not described.

**Table S4.** Patient demographics.

| Study            | Device      | N Patients | Age                                  | Male gender             | BMI                      | Hypertension            | History of Smoking    | Diabetes Mellitus       | Peripheral Artery Disease | Previous CVA or TIA     | Previous MI             | COPD             | AF       |
|------------------|-------------|------------|--------------------------------------|-------------------------|--------------------------|-------------------------|-----------------------|-------------------------|---------------------------|-------------------------|-------------------------|------------------|----------|
|                  |             | S/HS       | S/HS                                 | S/HS                    | S/HS                     | S/HS                    | S/HS                  | S/HS                    | S/HS                      | S/HS                    | S/HS                    | S/HS             | S/HS     |
| Eckstein 2002    | St Jude DAD | 14         | 63 (8)                               | -                       | -                        | -                       | -                     | -                       | -                         | -                       | -                       | -                | -        |
| Wiklund 2005     | St Jude DAD | 30/30      | 69 (48-83) / 67 (42-81) <sup>a</sup> | 29 (95%) / 26 (85%)     | -                        | 19 (63.3%) / 13 (43.3%) | 12 (40%) / 12 (40%)   | 6 (20%) / 9 (30%)       | 0 (0%) / 4 (13.3%)        | 4 (13.3%) / 2 (6.7%)    | 14 (46.7%) / 12 (40%)   | 0 (0%) / 3 (10%) | -        |
| Klima 2003       | MVP         | 32         | 65 (9)                               | 27 (90%)                | -                        | 23 (71.9%)              | 15                    | 10 (31.3%)              | 8                         | 5 (15.6%)               | -                       | 5                | -        |
| Vicol 2006       | MVP         | 11         | -                                    | 10 (91%)                | -                        | -                       | -                     | -                       | -                         | -                       | -                       | -                | -        |
| Kim 2004         | AADD        | 14         | 65 (7)                               | 10 (71%)                | -                        | -                       | 8 (57.1%)             | 8 (57.1%)               | -                         | 2 (14.3%)               | -                       | -                | -        |
| Klima 2005       | CAC         | 15         | 65.9 (8.6)                           | 13 (87%)                | -                        | 10 (69.2%)              | 4 (26.7)              | -                       | -                         | -                       | 6 (38.4%)               | -                | -        |
| Boening 2005     | CAC         | 46         | 63.3 (7.5)                           | 44 (96%)                | -                        | -                       | 14 (36.8%)            | -                       | 4 (10.2%)                 | 1 (2.6%)                | 16 (42.1%)              | -                | 3 (7.9%) |
| Cai 2007         | C-port      | 50         | 68.0 (9.7)                           | -                       | -                        | -                       | -                     | -                       | -                         | -                       | -                       | -                | -        |
| Verberkmoes 2013 | C-port      | 35/36      | 67.6 (5.6) / 66.5 (5.7)              | 31 (89%) / 32 (89%)     | 27.5 (3.7) / 27.1 (3.3)  | 20 / 20                 | -                     | 9 / 11                  | 6 / 5                     | 4 / 4                   | 9 / 15                  | 3 / 5            | -        |
| Balkhy 2018      | C-port      | 117/3014   | -                                    | -                       | -                        | 49 / 2263               | 35 / 690              | 48 / 1139               | 12 / 369                  | 11 / 382                | 50 / 609                | -                | -        |
| Cheng 2021       | U-clip      | 126/154    | 59.1 (9.0) / 60.7 (10.2)             | 105 (83%) / 120 (77.9%) | (24.6 (3.5) / 25.3 (3.1) | 73 (57.9%) / 92 (59.7%) | 62 (49.2%) / 77 (50%) | 37 (29.4%) / 43 (27.9%) | -                         | 15 (11.9%) / 21 (13.6%) | 21 (16.7%) / 27 (17.5%) | -                | -        |

**Table S4.** Patient demographics, continued.

| Study            | Device      | N Patients | LVEF                         | NYHA 1-2                     | NYHA 3-4                   | EURO-score II            | SYNTAX-score | N diseased coronary arteries | Previous PCI             |
|------------------|-------------|------------|------------------------------|------------------------------|----------------------------|--------------------------|--------------|------------------------------|--------------------------|
|                  |             | S/HS       | S/HS                         | S/HS                         | S/HS                       | S/HS                     | S/HS         | S/HS                         | S/HS                     |
| Eckstein 2002    | St Jude DAD | 14         | -                            | -                            | -                          | -                        | -            | -                            | -                        |
| Wiklund 2005     | St Jude DAD | 30/30      | -                            | 27 / 27                      | 2 / 2                      | -                        | -            | -                            | 0 (0%) / 1 (3%)          |
| Klima 2003       | MVP         | 32         | -                            | 21                           | 10                         | -                        | -            | -                            | -                        |
| Vicol 2006       | MVP         | 11         | -                            | -                            | -                          | -                        | -            | -                            | -                        |
| Kim 2004         | AADD        | 14         | 58 (7)                       | -                            | -                          | -                        | -            | -                            | -                        |
| Klima 2005       | CAC         | 15         | 60.6 (10.3)                  | 6                            | 9                          | -                        | -            | -                            | 4 (26.7%)                |
| Boening 2005     | CAC         | 46         | 60.6 (12.4)                  | -                            | -                          | -                        | -            | -                            | 11 (28.9%)               |
| Cai 2007         | C-port      | 50         | 53.8 (10.6) /<br>50.5 (13.0) | -                            | -                          | -                        | -            | -                            | -                        |
| Verberkmoes 2013 | C-port      | 35/36      | *32 (91%) /<br>33 (92%)      | -                            | -                          | -                        | -            | 2.63 (0.49) /<br>2.61 (0.54) | -                        |
| Balkhy 2018      | C-port      | 117/3014   | 54 / -                       | -                            | -                          | -                        | -            | -                            | -                        |
| Cheng 2021       | U-clip      | 126/154    | 63.0 (7.1) /<br>62.5 (6.9)   | 108 (85.7%) /<br>126 (81.8%) | 18 (14.3%) /<br>28 (18.2%) | 1.4 (0.6) /<br>1.5 (0.7) | -            | -                            | 14 (11.1%) /<br>17 (11%) |

Data is presented for the sutureless (S) and hand-sewn (HS) patients. Single values indicate in-patient controls and belong to the sutureless group. Abbreviations: CVA, cerebrovascular event ; TIA, transient ischemic attack ; MI, myocardial infarction ; COPD, chronic obstructive pulmonary disease ; AF, atrial fibrillation ; LVEF, left ventricular ejection fraction ; PCI, Percutaneous coronary intervention. -, not described. \* Number of patients with LVEF > 50%.

**Table S5.** Interventional details.

| Study            | Device      | N Patients | Off-pump                | Surgical approach       | Coronary target                   | Donor graft                 | Graft routing                           | Coronary target diameter, in mm | Donor graft diameter, in mm |
|------------------|-------------|------------|-------------------------|-------------------------|-----------------------------------|-----------------------------|-----------------------------------------|---------------------------------|-----------------------------|
|                  |             | S/HS       | S/HS                    | S/HS                    | S/HS                              | S/HS                        | S/HS                                    | S/HS                            | S/HS                        |
| Eckstein 2002    | St Jude DAD | 14         | 0 (0%)                  | -                       | RCA,PDA,OM / -                    | SVG                         | -                                       | -                               | -                           |
| Wiklund 2005     | St Jude DAD | 30 / 30    | 0 (0%) / 0 (0%)         | -                       | OM,RCA,PDA,D,MR / OM,RCA,PDA,D,MR | SVG / SVG                   | Single / Single                         | -                               | -                           |
| Klima 2003       | MVP         | 32         | 6 (18.8%)               | -                       | RCA,PDA,PLA,LAD,D,OM,MR / -       | LIMA, SVG / -               | -                                       | -                               | -                           |
| Kim 2004         | MVP         | 11         | 32 (100%)               | Sternotomy              | D,OM,PDA,RCA,PLA / LAD,D,OM       | IMA,RGEA,SVG / IMA,RGEA,SVG | Single, sequential / Single, sequential | 1.0 (0.3) / -                   | 3.0 (0.5) / -               |
| Boening 2005     | AADD        | 14         | 0 (0%)                  | Sternotomy              | non-LAD / -                       | SVG / -                     | Single / -                              | -                               | -                           |
| Klima 2005       | CAC         | 15         | 0 (0%)                  | -                       | D,RCA,Cx,OM / -                   | SVG                         | -                                       | 5 (31%)*                        | -                           |
| Vicol 2006       | CAC         | 46         | -                       | Sternotomy              | LAD,D,RCA,OM / -                  | IMA,SVG,RA / -              | -                                       | 2.03                            | -                           |
| Cai 2007         | C-port      | 50         | 46 (92%) / -            | -                       | D,OM,PDA / D,OM,PDA               | SVG / SVG                   | -                                       | -                               | -                           |
| Verberkmoes 2013 | C-port      | 35/36      | 5 (14%) / 3 (8%)        | Sternotomy / Sternotomy | non-LAD / non-LAD                 | SVG / SVG                   | Single, sequential / Single, sequential | 1.48 (0.22) / 1.49 (0.32)       | -                           |
| Balkhy 2018      | C-port      | 117/3014   | 116 (99%) / -           | TECAB / -               | LAD,Cx,RCA / -                    | SVG / SVG                   | -                                       | 1.8 (0.4) / -                   | -                           |
| Cheng 2021       | U-clip      | 126/154    | 126 (100%) / 154 (100%) | TECAB / thoracotomy     | LAD / LAD,D,RCA                   | LIMA / LIMA,RIMA            | Single / Single, sequential             | -                               | -                           |



**Table S5.** Interventional details, continued.

| Study               | Device      | N Patients | Cross-clamp time,<br>in minutes | CPB-time,<br>in minutes | Anastomotic construction time,<br>in minutes | Blood transfusion rate,<br>in Units |
|---------------------|-------------|------------|---------------------------------|-------------------------|----------------------------------------------|-------------------------------------|
|                     |             | S/HS       | S/HS                            | S/HS                    | S/HS                                         | S/HS                                |
| Eckstein 2002       | St Jude DAD | 14         | -                               | -                       | 6-10                                         | -                                   |
| Wiklund 2005        | St Jude DAD | 30/30      | 37 (2) / 35 (2)                 | 65 (4) / 59 (3)         | 2.3 (0.18)*                                  | -                                   |
| Klima 2003          | MVP         | 32         | 46 (19)                         | 92 (16)                 | 2.2 (1.3)                                    | -                                   |
| Kim 2004            | MVP         | 11         | NA                              | NA                      | 2.9 (0.7) / -                                | -                                   |
| Boening 2005        | AADD        | 14         | 40 (13)                         | 80 (21)                 | 6.6 (5.5) / -                                | -                                   |
| Klima 2005          | CAC         | 15         | 39.4 (9.2)                      | -                       | 118.3 (48.9) / -                             | -                                   |
| Vicol 2006          | CAC         | 46         | -                               | -                       | -                                            | -                                   |
| Cai 2007            | C-port      | 50         | NA / -                          | NA / -                  | -                                            | -                                   |
| Verberkmoes<br>2013 | C-port      | 35/36      | 46 (16) / 44 (18)               | 81 (28) / 71 (24)       | -                                            | -                                   |
| Balkhy 2018         | C-port      | 117/3014   | NA                              | NA                      | -                                            | -                                   |
| Cheng 2021          | U-clip      | 126/154    | NA                              | NA                      | 9.6 (3.7) / 16.9 (3.8)                       | 0.8 (1.6) / 0.9 (1.7)               |

Data is presented for the sutureless (S) and hand-sewn (HS) patients. Single values indicate in-patient controls and belong to the sutureless group. Abbreviations: St Jude DAD, St Jude distal anastomotic device ; RCA, right coronary artery ; PDA, posterior descending coronary artery ; OM, obtuse marginal coronary artery ; D, diagonal coronary artery ; MR, ramus marginalis coronary artery ; SVG, saphenous vein graft ; MVP, magnetic vascular positioner ; PLA, posterolateral coronary artery ; LAD, left anterior descending coronary artery ; LIMA, left internal mammary artery ; IMA, internal mammary artery ; RGEA, gastro-epiploic artery graft ; AADD, automated anastomotic distal device ; CAC, coronary anastomotic coupler ; RA, radial artery ; Cx, circumflex coronary artery ; RIMA, right internal mammary artery ; CPB, cardiopulmonary bypass. -, not described. NA, not applicable. \*Presented without connector deployment time.

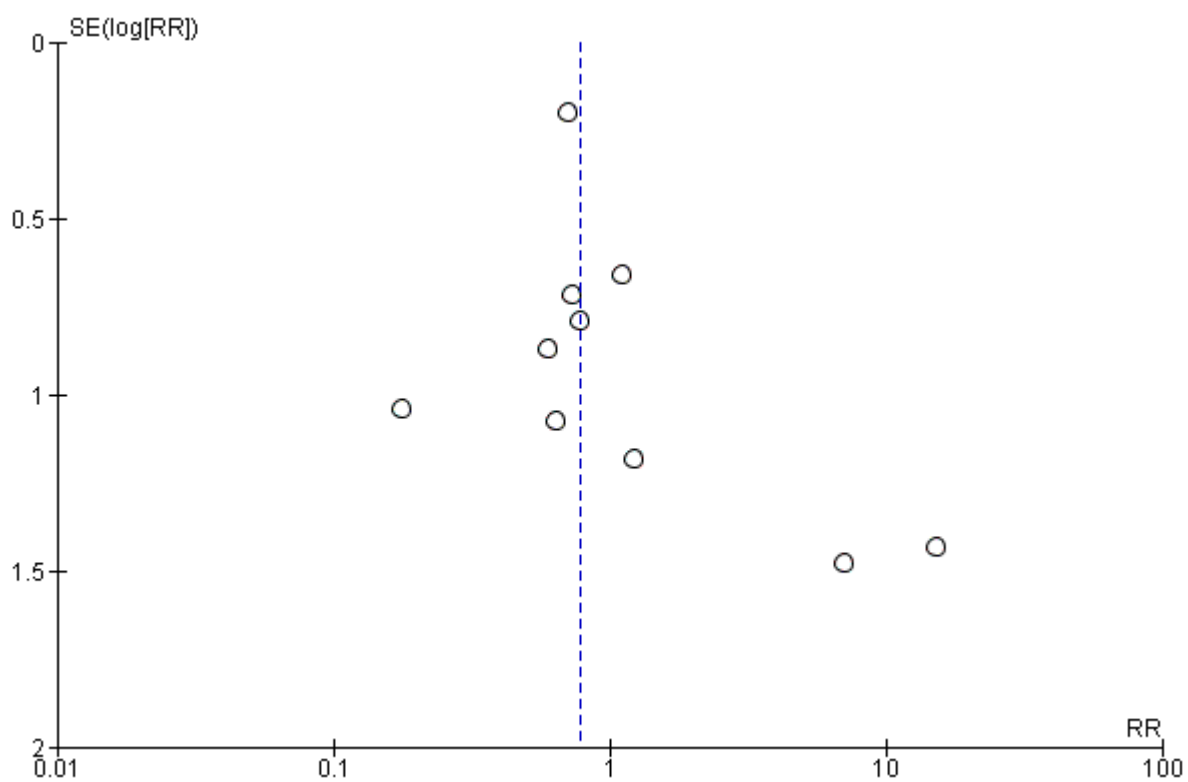

**Figure S1.** Funnel plot presenting no publication bias for the primary outcome patency.

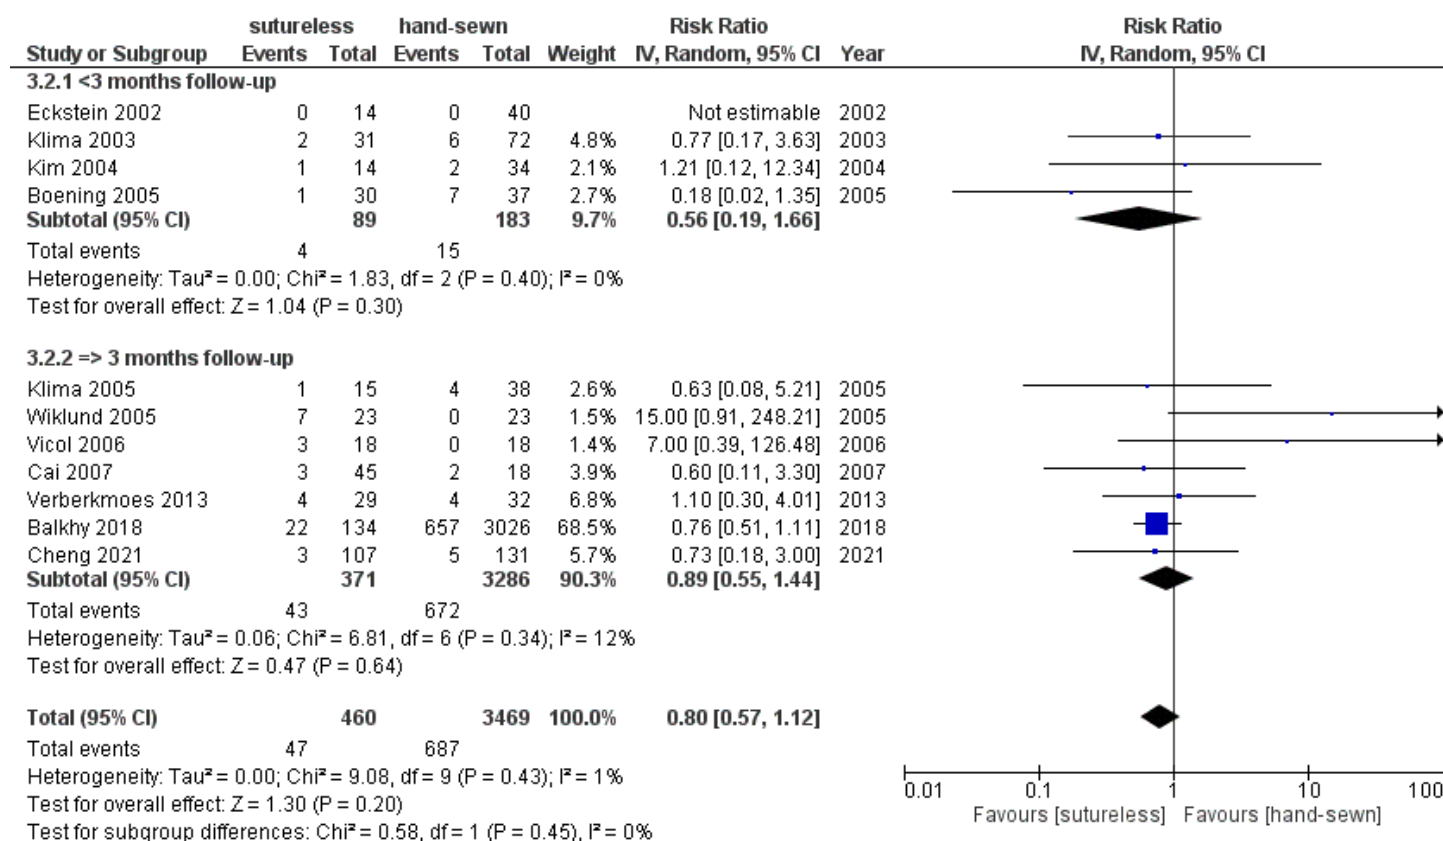

**Figure S2.** Stratification patency outcome, per follow-up length.

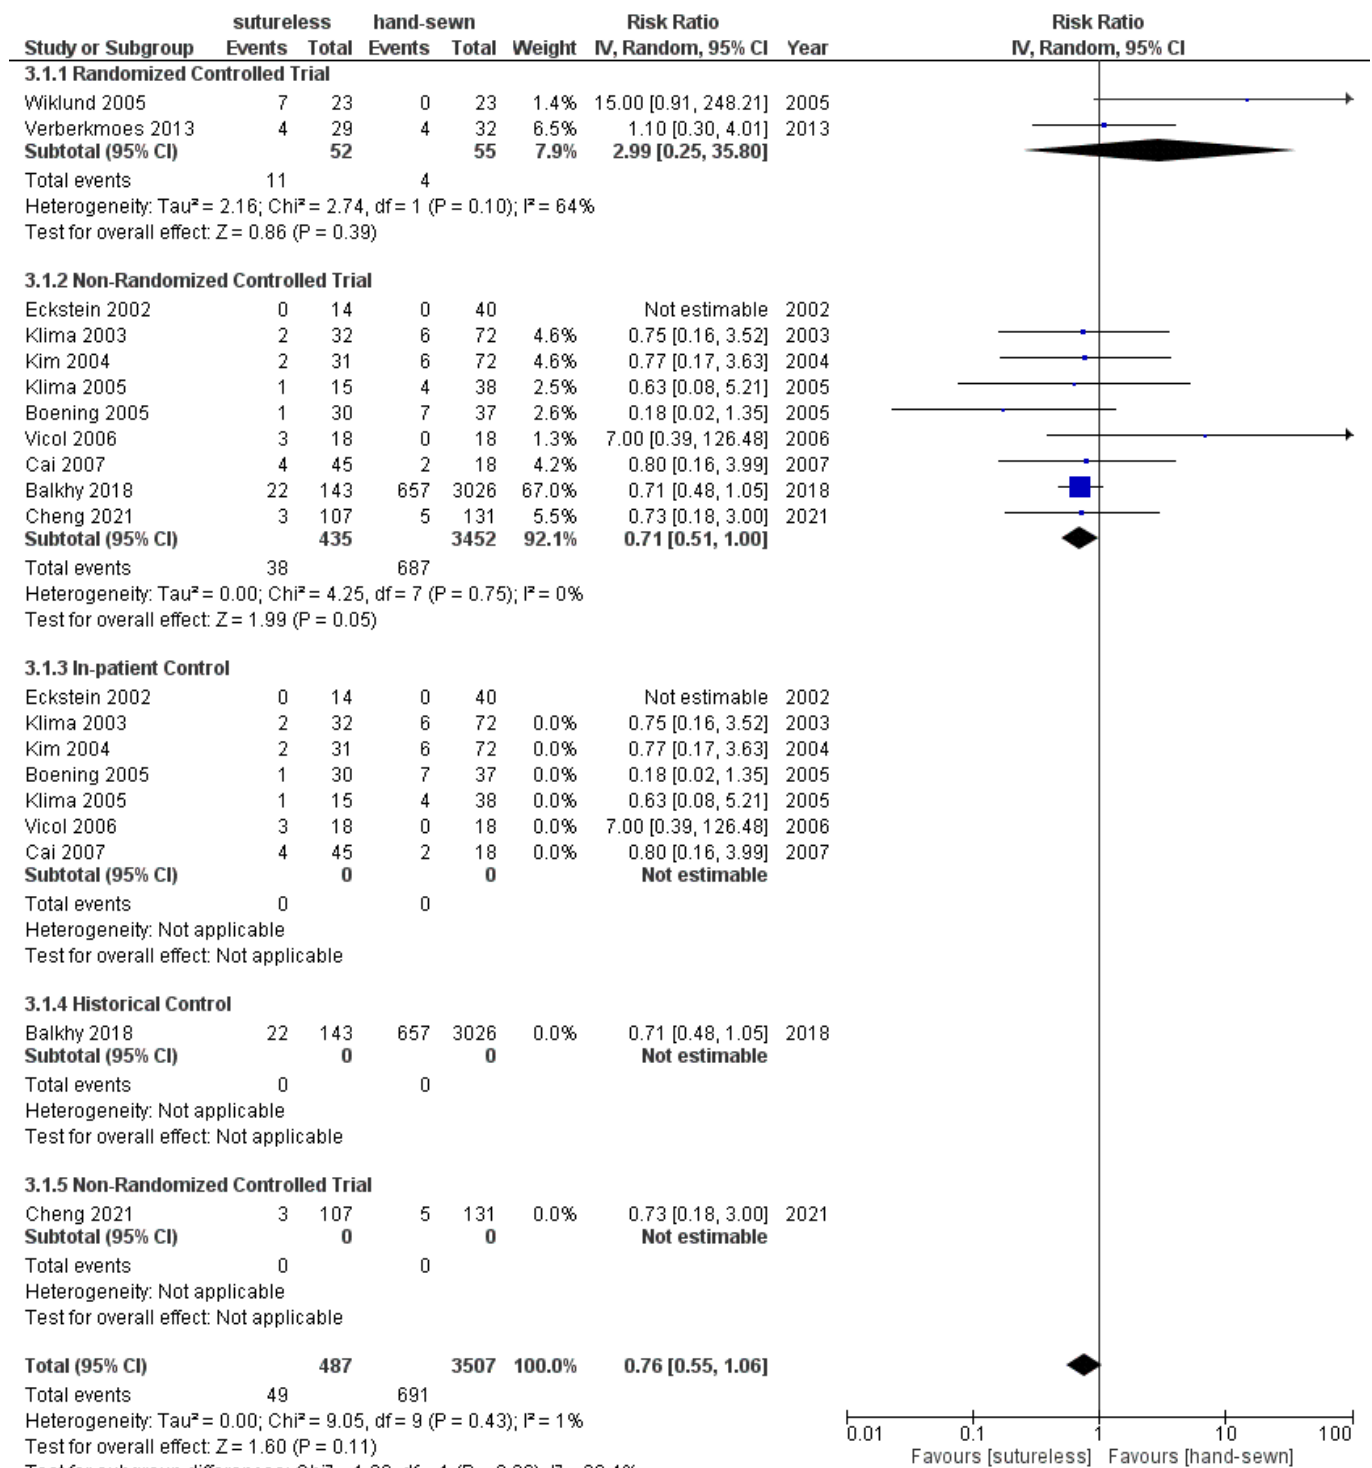

**Figure S3.** Sensitivity analyses patency outcome, per study design.
